# Supplementary material for: Isoform-specific subcellular localization and function of protein kinase A identified by mosaic imaging of mouse brain
Source: eLife journal article supplement (doi:10.7554/elife.17681), 2017-01-12
Supplement: supp [file elife-17681-supp-v1.zip]

Controls of secondary antibodies only:

Alexa Fluor 488 Donkey anti rabbit   Cy3 Donkey anti sheep   Dapi

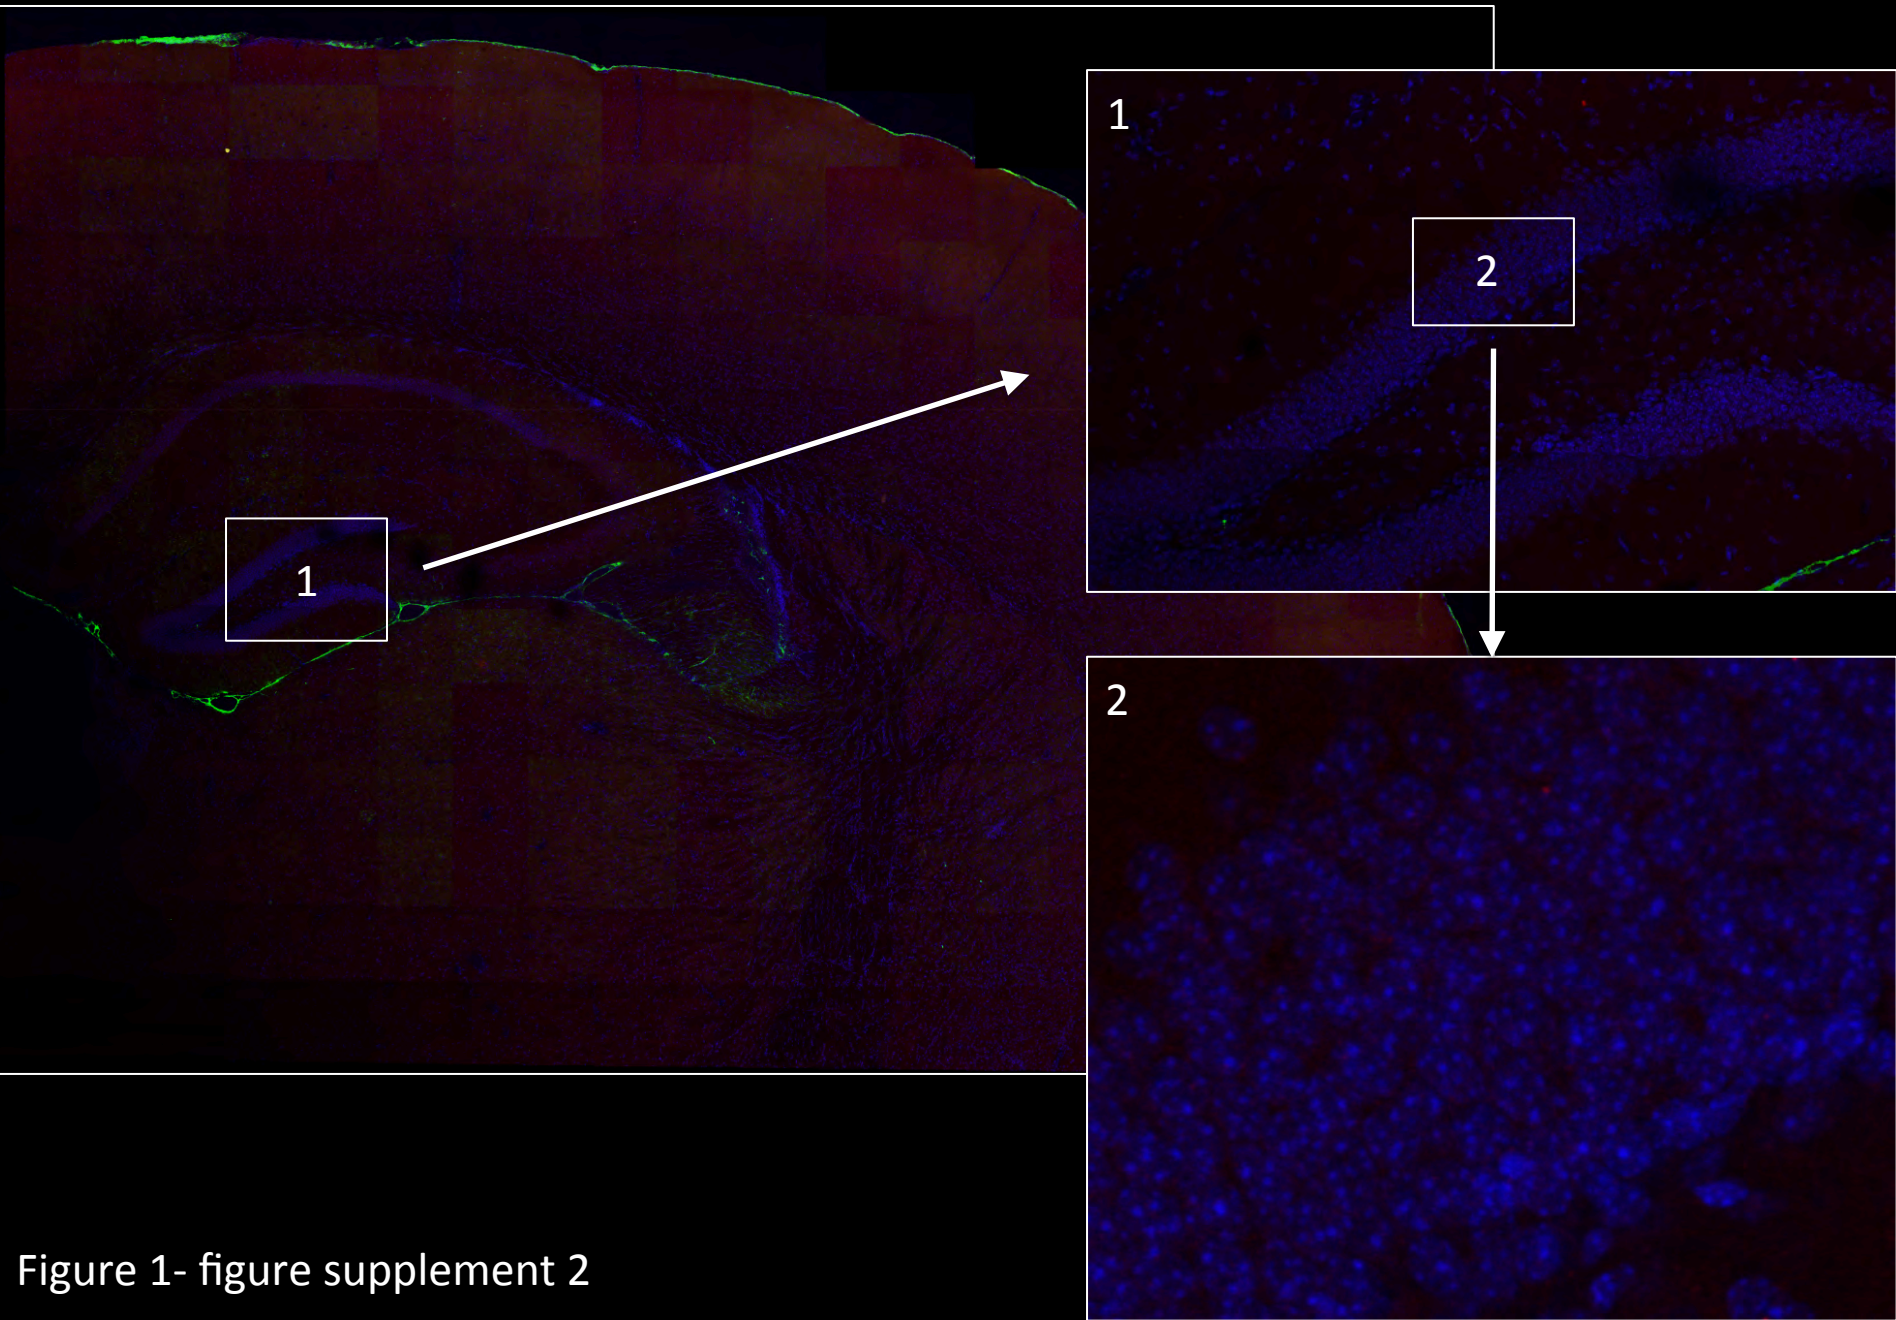

Figure 1- figure supplement 2
