# Supplementary figures and images for: Isoform-specific subcellular localization and function of protein kinase A identified by mosaic imaging of mouse brain
Source: eLife journal article supplement (doi:10.7554/elife.17681), 2017-01-12

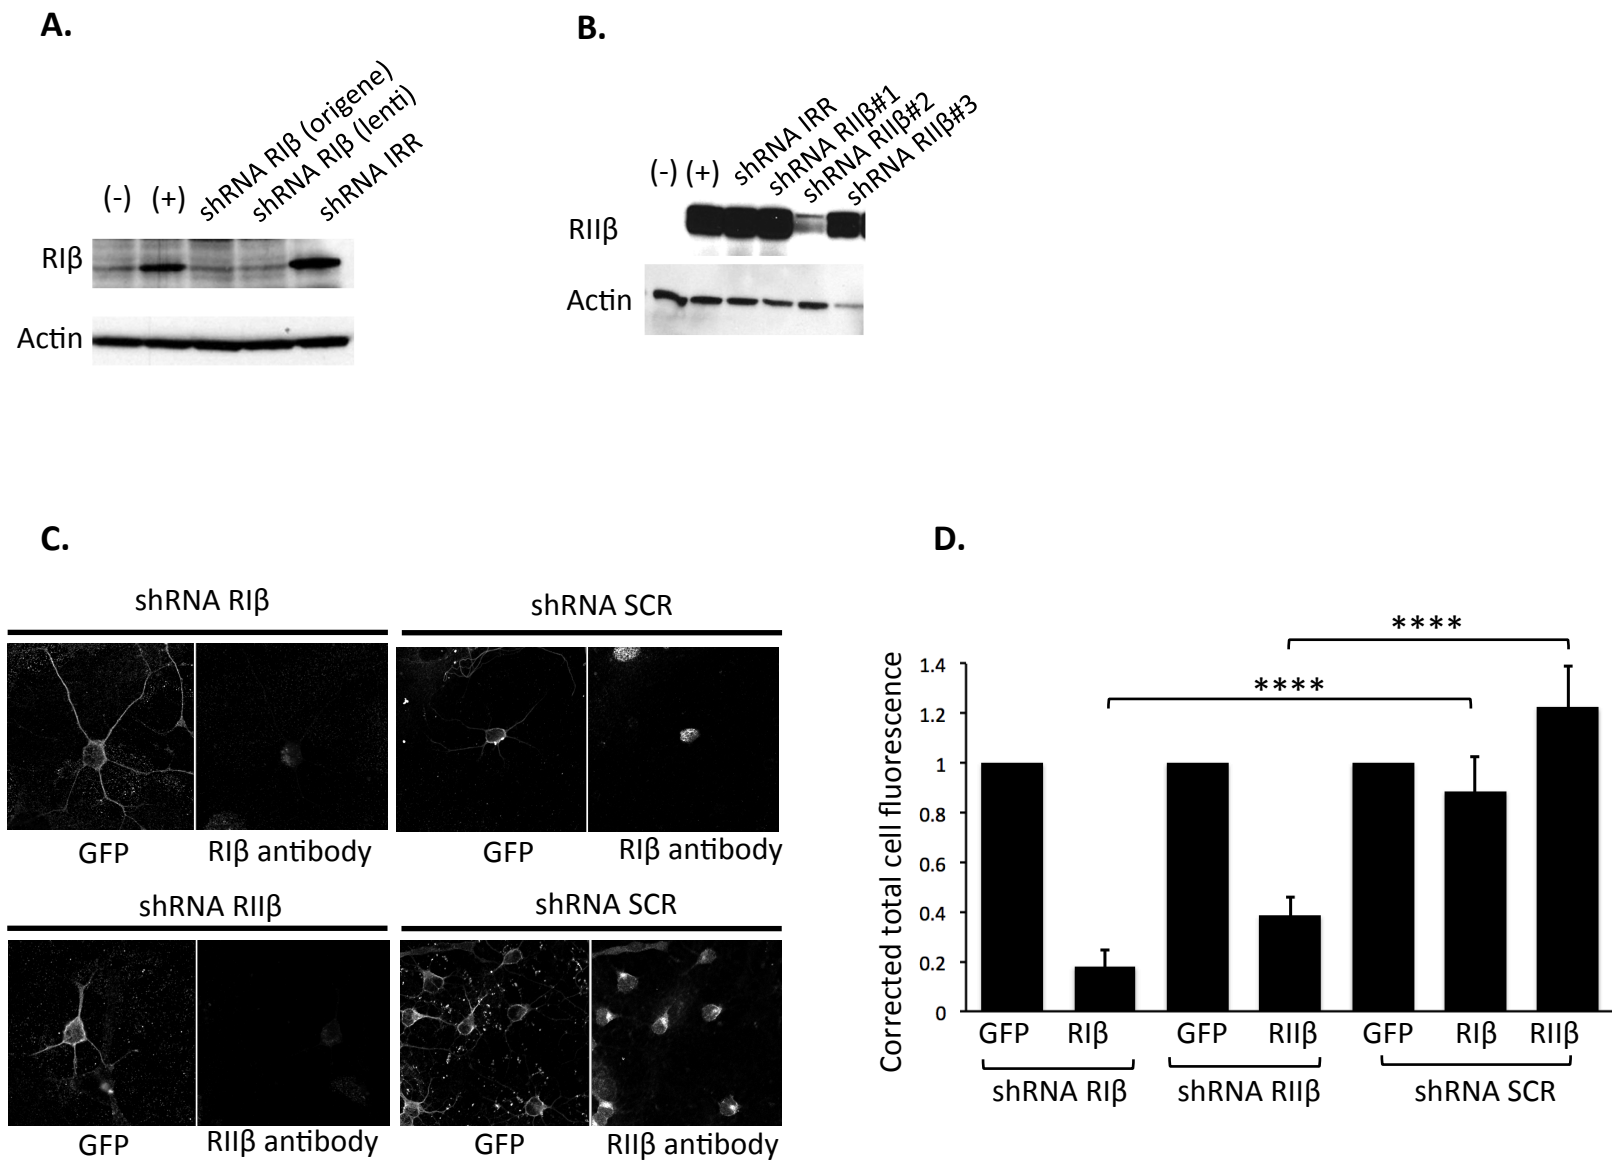

**Figure 8-figure supplement 1**

Supplement: supp [file elife-17681-supp-v1.zip]

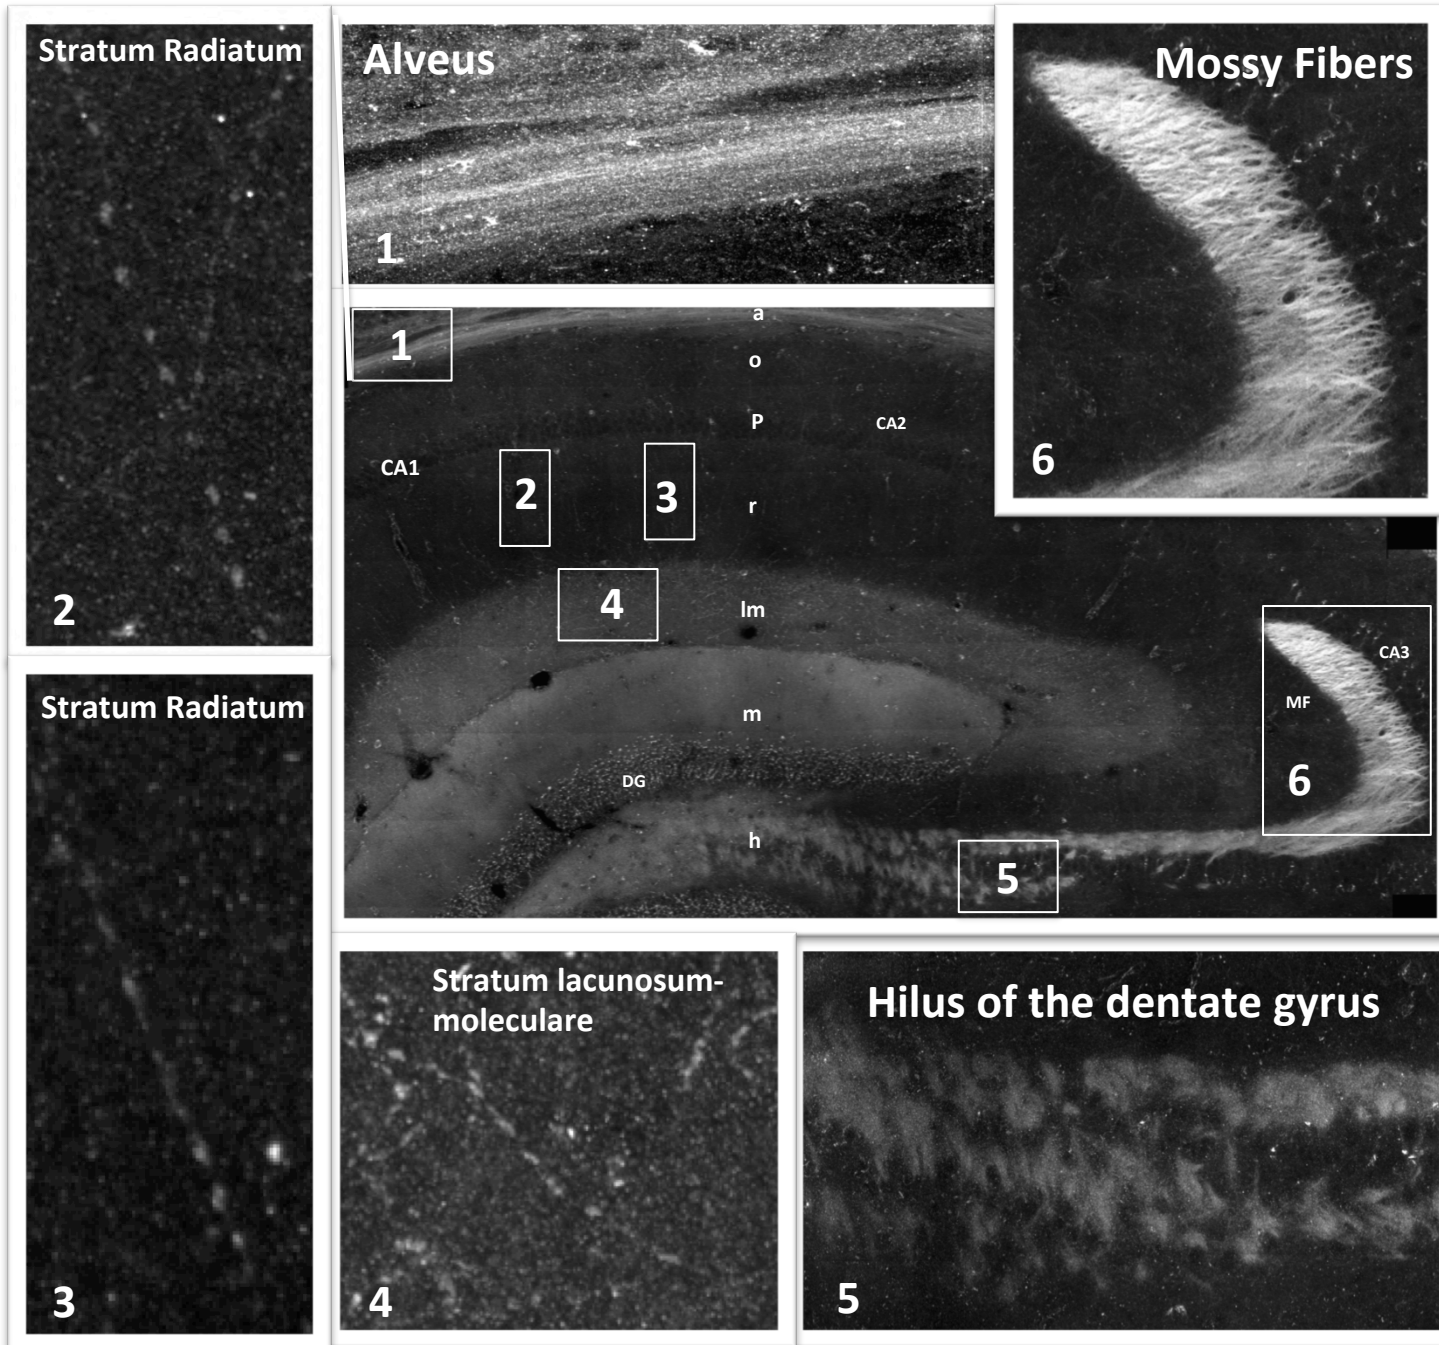

**Figure 3- figure supplement 1**

Supplement: supp [file elife-17681-supp-v1.zip]

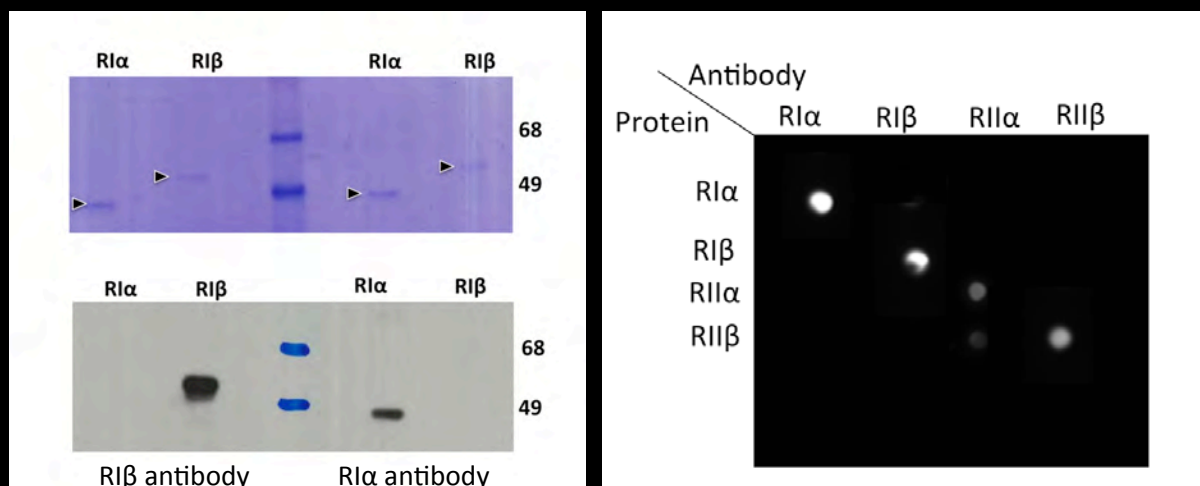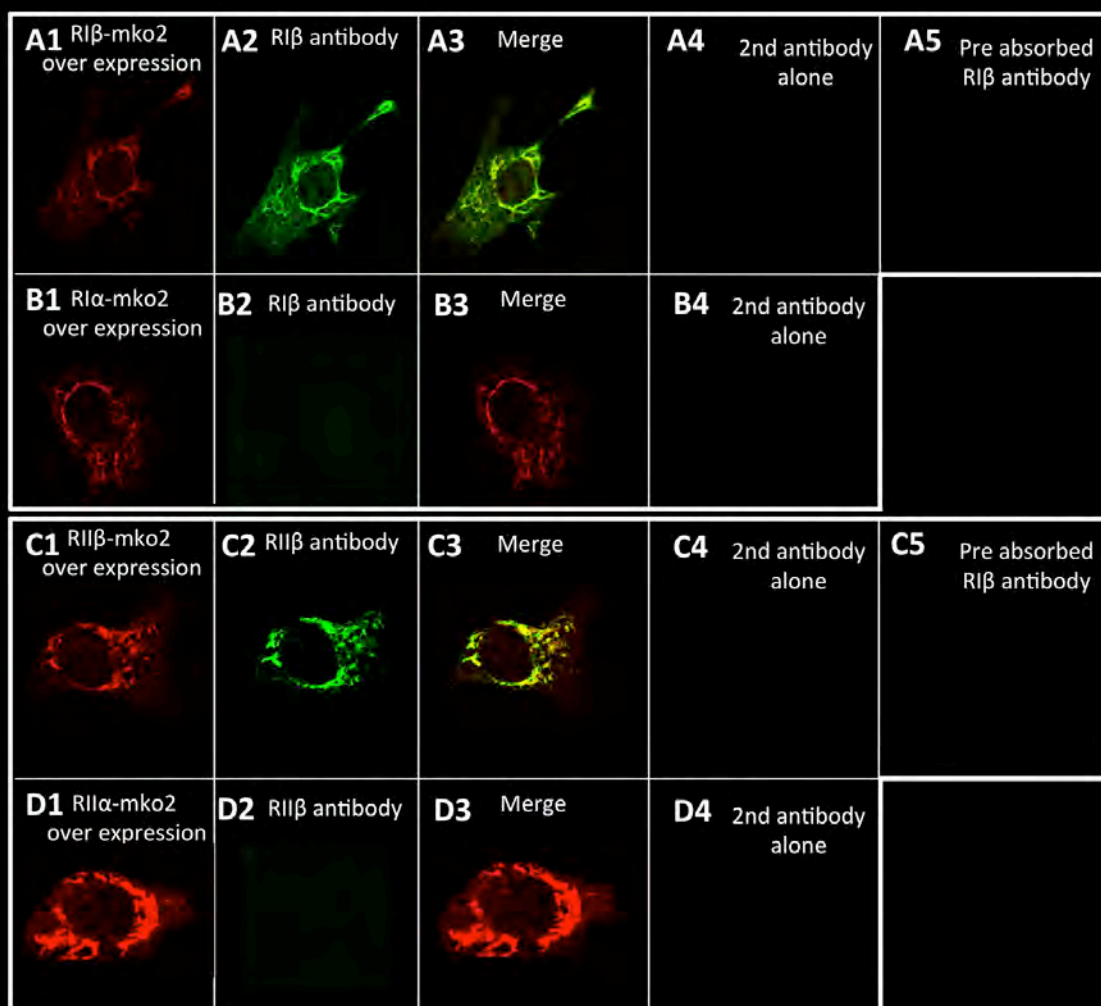

**Figure 1- figure supplement 1**

Supplement: supp [file elife-17681-supp-v1.zip]
